# Supplementary material for: Effect of Prehospital Epinephrine on Outcomes of Out-of-Hospital Cardiac Arrest: A Bayesian Network Approach
Source: Emerg Med Int. 2020 Aug 1;2020:8057106. doi: 10.1155/2020/8057106 (PMC7416253; doi:10.1155/2020/8057106)
Supplement: Supplementary Materials — Supplemental Figure 1: potential causal pathways allowed to be included in the DAG structure. Supplemental Figure 2: conditional probabilities of exposure and outcome vertices. Supplemental Figure 3: effect of Epinephrine and SALS intervention assessed by network querying. Supplemental Table 1: definition of terms and detailed criteria used in this study. Supplemental Table 2: effect of epinephrine on prehospital ROSC rate. Supplemental Table 3: multivariable logistic regression model for the effect of SALS protocol on prehospital ROSC and neurologic recovery (6-month CPC score 1 or 2). Supplemental Table 4: effect of SALS intervention on prehospital ROSC and neurologic recovery. [file 8057106.f1.zip]

Archive with 5 entries (5 files):
- 8057106.f1/~$57106_SupplDesc.docx
- 8057106.f1/4. online_supplements.docx
- 8057106.f1/suppl_fig_1.eps
- 8057106.f1/suppl_fig_2.eps
- 8057106.f1/suppl_fig_3.eps
